# Supplementary material
Source: PubMed Central journal article supplement (PMC1551898)
Supplement: pnas_0601150103_1.pdf [file pnas_0601150103_1.pdf]

**Table 3. Functional grouping of the PCGs**

| Functional group                         | P3-SHAM     | P7-U7         |
|------------------------------------------|-------------|---------------|
| Cell adhesion                            | 8 (1.6)     | 27 (2.2)      |
| Cell cycle/proliferation/differentiation | 17 (3.4)    | 22 (1.8)      |
| Cell metabolism                          | 31 (6.1)    | 89 (7.4)      |
| Cell signaling                           | 41 (8.1)    | 100 (8.3)     |
| Cytoskeleton                             | 4 (0.8)     | 46 (3.8)      |
| DNA modification                         | 10 (2.0)    | 22 (1.8)      |
| Extracellular architecture               | 2 (0.4)     | 6 (0.5)       |
| Extracellular signal transduction        | 3 (0.6)     | 15 (1.2)      |
| Ion channel and transporter              | 14 (2.8)    | 31 (2.6)      |
| Metabolite/protein transport             | 17 (3.4)    | 67 (5.5)      |
| Posttranslational modification           | 42 (8.3)    | 93 (7.7)      |
| Transcriptional regulation               | 36 (7.1)    | 89 (7.4)      |
| Translational regulation                 | 6 (1.2)     | 17 (1.4)      |
| ETC                                      | 6 (1.2)     | 30 (2.5)      |
| Unknown                                  | 268 (53.1)  | 554 (45.9)    |
| Total                                    | 505 (100.0) | 1,208 (100.0) |
| Synaptic function                        | 3 (0.6)     | 20 (1.7)      |

The percentage ratio is indicated in the parentheses.
