# Supplementary material
Source: PubMed Central journal article supplement (PMC1551898)
Supplement: pnas_0601150103_2.pdf [file pnas_0601150103_2.pdf]

**Table 4. Relative expression level in the ipsilateral AIN determined by qRT-PCR**

| Gene         | Relative mRNA expression level |               |               |             |              |
|--------------|--------------------------------|---------------|---------------|-------------|--------------|
|              | Naïve                          | U3            | P3            | U7          | P7           |
| <i>Per1</i>  | 1.00 ± 0.04                    | 1.75 ± 0.08   | 2.42 ± 0.58   | 1.75 ± 0.33 | 2.31 ± 0.24  |
| <i>Clk</i>   | 1.00 ± 0.15                    | 2.11 ± 0.22** | 2.00 ± 0.11** | 1.58 ± 0.18 | 1.97 ± 0.15* |
| <i>Cebpd</i> | 1.00 ± 0.40                    | 1.14 ± 0.11   | 1.34 ± 0.32   | 0.90 ± 0.10 | 1.32 ± 0.27  |
| <i>Desrt</i> | 1.00 ± 0.19                    | 1.56 ± 0.21   | 1.50 ± 0.34   | 1.20 ± 0.11 | 1.36 ± 0.34  |
| <i>Gtl2</i>  | 1.00 ± 0.12                    | 1.05 ± 0.05   | 1.24 ± 0.42   | 0.84 ± 0.11 | 0.76 ± 0.13  |

Relative mRNA expression is indicated as mean ± SEM. \*,  $P < 0.05$ ; \*\*,  $P < 0.01$  (both in one-way ANOVA followed by Tukey–Kramer multiple comparisons test).
