# Supplementary material
Source: PubMed Central journal article supplement (PMC1551898)
Supplement: pnas_0601150103_3.pdf [file pnas_0601150103_3.pdf]

**Table 5. Information on the oligonucleotide primer pairs used in real-time RT-PCR and *in situ* hybridization**

| Gene           |           | Primer pairs |           |                           |            | Size, bp |          |
|----------------|-----------|--------------|-----------|---------------------------|------------|----------|----------|
| Name           | GenBank   | Use          | Location  | Sequence (5'-3')          | $T_m$ , °C | Oligo    | Amplicon |
| <i>Gapdh</i>   | M32599    | S            | 730-749   | CATGGCCTTCCGTGTTTCCTA     | 60         | 20       | 104      |
|                |           |              | 813-833   | CCTGCTTCACCACCTTCTTGA     |            | 21       |          |
| <i>Sgk</i>     | AF205855* | S            | 2153-2180 | GCCCGTTTTATAGGTGACATTTTAA | 60         | 25       | 79       |
|                |           |              | 2101-2120 | TTTATGGACCAATGCCCCAG      |            | 20       |          |
| <i>Sgk</i>     | AF205855  | H            | 1768-1778 | GCTTTTTCTCTATCGCAGAGTG    | 56         | 21       | 384      |
|                |           |              | 2132-2151 | CAATGAAAACACCAACGGCT      |            | 20       |          |
| <i>IkBa</i>    | U57524*   | S            | 325-347   | CACATTTCAACAAGAGCGAAACC   | 60         | 23       | 128      |
|                |           |              | 433-452   | CATCGTGGAGCACTTGGTGA      |            | 20       |          |
| <i>IkBa</i>    | U57524    | H            | 243-263   | TGGCCAGTGTAGCAGTCTTGA     | 57         | 21       | 406      |
|                |           |              | 628-648   | TCCGTGTCATAGCTCTCCTCA     |            | 21       |          |
| <i>Plekhf1</i> | AW049880  | S            | 210-228   | AGGTCACCTGGGCCTGAAG       | 60         | 19       | 113      |
|                |           |              | 302-322   | TGGAAGAGCCTGAGACTTGCA     |            | 21       |          |
| <i>Plekhf1</i> | AW049880  | H            | 56-76     | GCTTTTCTCCCTGACCCTAGA     | 56         | 21       | 382      |
|                |           |              | 418-437   | AACCCTTGGAACCTTGACCAG     |            | 20       |          |
| <i>Vamp1</i>   | U61751*   | S            | 215-235   | CTTGTCCACATTCACACGCAT     | 60         | 21       | 82       |
|                |           |              | 275-296   | CATGACCAGTAACAGGCGGTTA    |            | 22       |          |
| <i>Vamp1</i>   | NM_009496 | H            | 1049-1070 | CCAGAGGTCTGTTTAAAGACCA    | 55         | 22       | 390      |
|                |           |              | 1419-1438 | ATGCAGCTCTCATTCTCGT       |            | 22       |          |
| <i>Camk2d</i>  | NM_023813 | T            |           | Assay ID - Mm00612575_m1  |            |          |          |
| <i>Camk2d</i>  | NM_023813 | H            | 1562-1583 | ACTTCTTCATTCTGTCCTCAAG    | 62         | 22       | 420      |
|                |           |              | 1857-1876 | GGATCTTGGCATAACACAGAG     |            | 20       |          |
| <i>Prkcd</i>   | NM_011103 | T            |           | Assay ID - Mm00440891_m1  |            |          |          |
| <i>Prkcd</i>   | NM_011103 | H            | 1949-1967 | GACAAGAACCTCATCGACT       | 60         | 19       | 315      |
|                |           |              | 2351-2368 | ACCAGTCTCCTACATGCT        |            | 18       |          |

$T_m$ , annealing temperature; S, T, real-time RT-PCR with SYBR green I (S) or TaqMan probes (T); H, *in situ* hybridization.

\*Complement sequence of the gene was used for designing primers.
